# Supplementary material
Source: MDPI journal article supplement (https://www.mdpi.com/2414-4088/2/2/32)
Supplement: s1 [file s1]

Archive with 2 entries (2 files):
- Roussou-Katifori_MTI_Supplement_Info-and-consent-form.pdf
- Roussou-Katifori_MTI_Supplement_interview-questions-guides.pdf
