# Supplementary material
Source: MDPI journal article supplement (https://www.mdpi.com/2414-4088/2/2/32)
Supplement: s1 [file s1 › Roussou-Katifori_MTI_Supplement_Info-and-consent-form.pdf]

### **INTRODUCTION GUIDE**

**Welcome** and thank you for coming!

#### **[Communication & Interview Language]**

Our communication as well as what you are about to experience will be in English. However, we can communicate in Greek, if you feel more comfortable, though what you will be hearing inside the gallery (on the iPad) will still be in English.

#### **[About CHESS & the evaluation]**

We are designing and developing a kind of digital guide for the museum using mobile technologies, in this case an iPad.

We are still in the early stages so what you will see here is not finished; this is why you are here, to help us design & refine it through your feedback!

#### **[Procedure]**

We would like to observe you while you are using what we have developed in the gallery, and then later ask you some questions about it (about what you liked or disliked, and other more specific questions).

While observing you, we would like you to do as you would do if you were visiting the museum on your own. Some of us will be following you around but this is an individual experience; we will not be asking you any questions or participating in this with you during your walk with the iPad.

Of course, if there are any problems (technical problems in using the iPad, or if you need to take a break, etc.), we will be there to help. And, if you feel comfortable with it, you can try to “think aloud” (i.e., talk to yourself and say out loud what you are thinking).

#### **[Consent. If child, say the following and give consent form to parent]**

One more thing before we start: we wish to videotape and audiotape this evaluation. This material will be used only for research and will not be published outside of the consortium and the European commission without your consent. Additionally, if you agree, we would like to take some photos of you during the process, which we may use in print publications and/or the website to promote the project.

Please look at this form, tick the relevant boxes and sign.

Ok, then. To start we would like you to first do a quiz.

**INFORMATION & CONSENT FORM**

**CHESS** is a research project co-funded by the European Commission. For more information on CHESS, please see [www.chessexperience.eu](http://www.chessexperience.eu)

We are conducting a study to observe how visitors interact with the CHESS prototype.

Initially, you will be asked to answer a short quiz, using a computer or a tablet. This should not take more than 10 minutes. Next, you will be guided to the Acropolis Museum's Archaic Gallery and given a digital tablet (an iPad). You will be free to explore the gallery and experience the story provided to you through the iPad (with both audio and visuals). This part will have an approximate duration of 25 minutes. After completing the CHESS experience, you will be guided to the room where project researchers will ask you questions about your experience, in a couple of interviews (approximately 30 minutes).

*Please read carefully and answer the following questions:*

Have you received enough information about this study? YES ☐ NO ☐

Do you understand that you are free to withdraw from this study at any time and without giving a reason for withdrawing? YES ☐ NO ☐

*You will be video and/or audio taped during the activity and the interview, for later observation by the researchers. The video will be used for data analysis purposes only and will be kept entirely confidential.*

Do you agree that you are video and/or audio taped? YES ☐ NO ☐

Do you agree that photographs of you can be taken and published in papers and/or the Web for project promotional purposes? YES ☐ NO ☐

NAME (Parent/Guardian)

NAME (Child)

SIGNATURE

*You are voluntarily making a decision on whether or not to consent to your or your child's participation in this research study. Your signature certifies that you have decided to participate, having read and understood the information presented. Your signature also certifies that you have had an adequate opportunity to discuss this study with the researchers and to ask questions. Your signature certifies that you give your permission for any results from this study to be used in any report or research paper, or verbal presentation, on the understanding that confidentiality will be preserved.*

*Η υπογραφή σας υποδηλώνει συγκατάθεση στους παραπάνω όρους που αφορούν στην εθελοντική συμμετοχή στην παρούσα έρευνα. Ως συμμετέχοντες στην έρευνα έχετε ενημερωθεί για το δικαίωμα πρόσβασης στα προσωπικά σας δεδομένα σύμφωνα με όσα ορίζονται στις σχετικές διατάξεις του Ν. 2472/97 για την προστασία του ατόμου από την επεξεργασία δεδομένων προσωπικού χαρακτήρα.*
